# Supplementary material for: Spherulization as a process for the exudation of chemical cues by the encrusting sponge C. crambe
Source: PubMed Central journal article supplement (PMC4933965; doi:10.1038/srep29474), 2016-07-06
Supplement: srep29474-s1.pdf [file srep29474-s1.pdf]

## Spherulization as a process for the exudation of chemical cues by the encrusting sponge *C. crambe*.

Eva Ternon<sup>a\*</sup>, Lina Zarate<sup>a,b</sup>, Sandrine Chenesseau<sup>c</sup>, Julie Croué<sup>d</sup>, Rémi Dumollard<sup>b</sup>, Marcelino T. Suzuki<sup>d</sup> and Olivier P. Thomas<sup>e,c,f,\*</sup>

### Supplemental Information

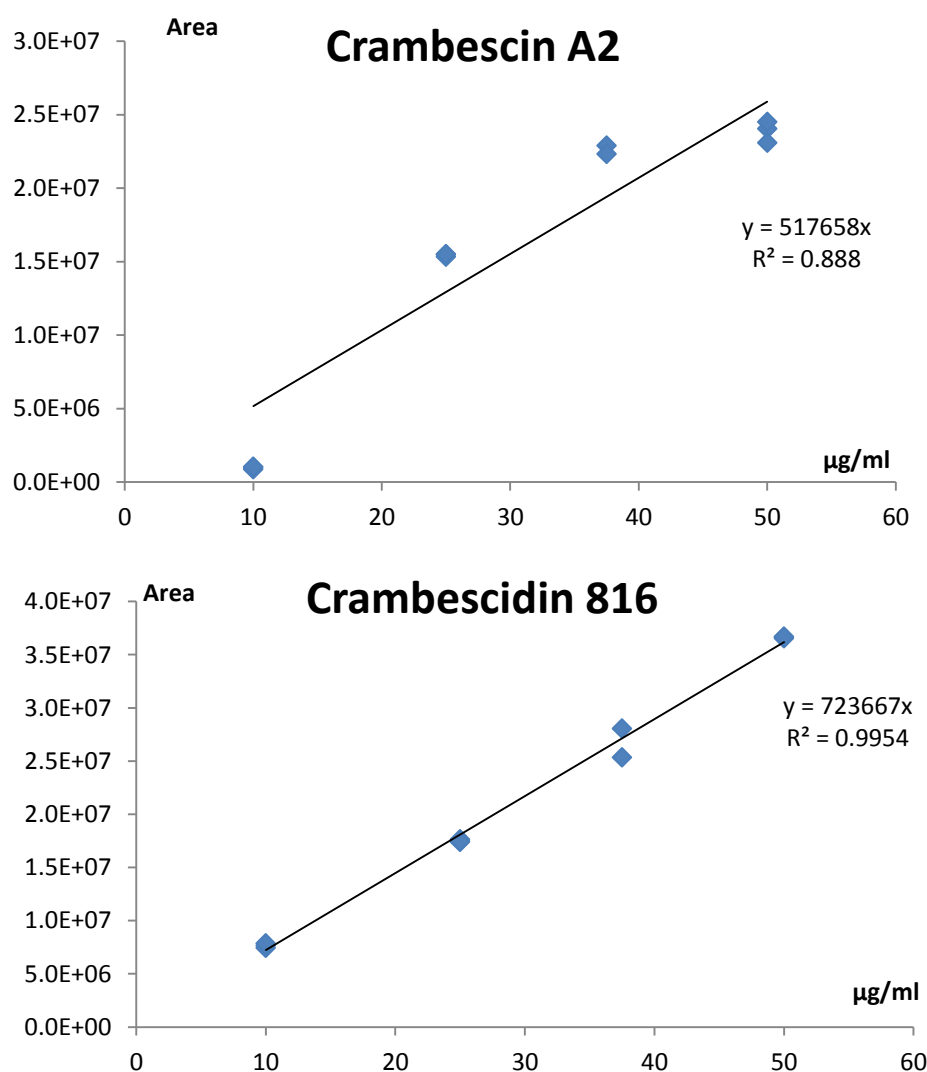

Figure 1. Calibration curve obtained by UHPLC-HRMS for the compounds crambescin A2 and crambescidin 816. Each point corresponds to a triplicate analysis.

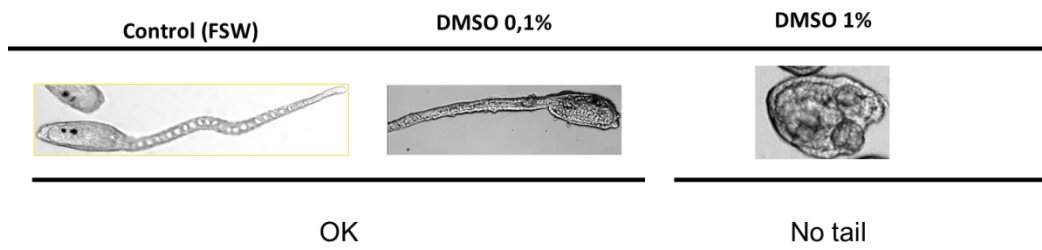

**Figure 2. Phenotype obtained for different concentrations of DMSO**

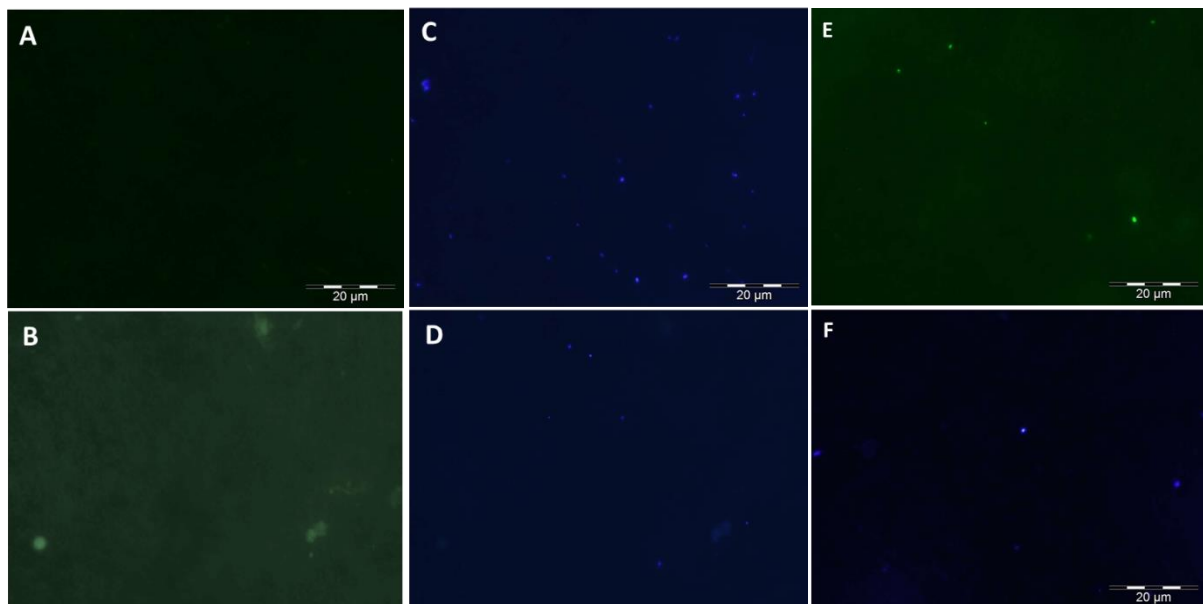

**Figure 3. No evidence of Betaproteobacteria was found in the sponge surrounding (0.2 µm filters), targeted with the BET467 probe (A and C) and its corresponding DAPI (C and D). E and F highlight the presence of representatives of marine eubacteria (EU I-II-III probe). Images of the sponge surrounding were taken before (A, C and E) and after (B, D and F) treatment.**

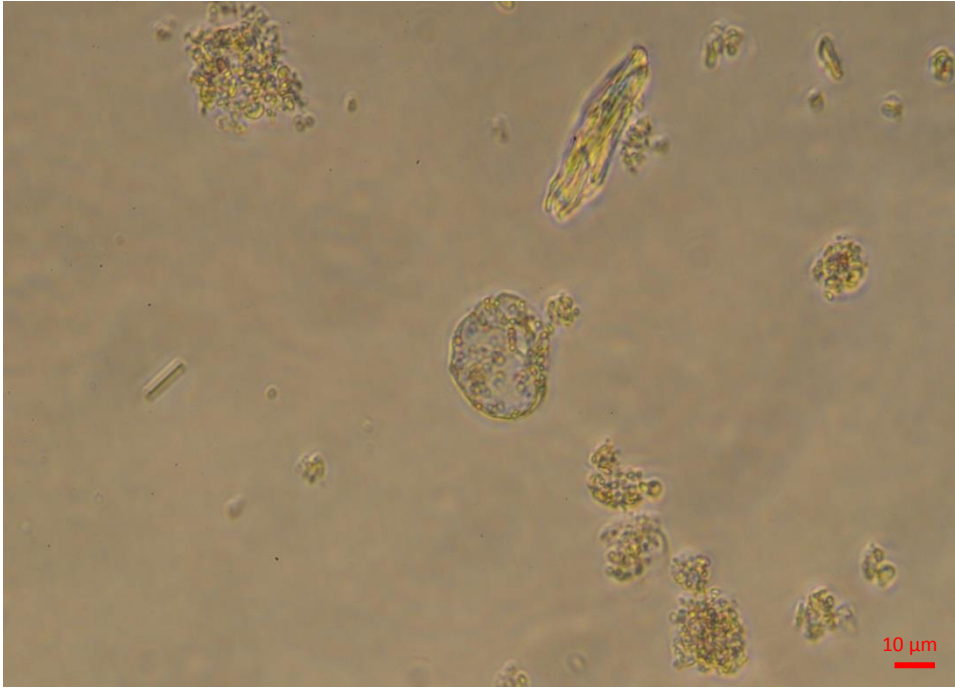

Figure 4. Broken and unbroken spherulous cells and their spherules in stressed seawater samples, under light microscopy (20 x 0.35 pH1).

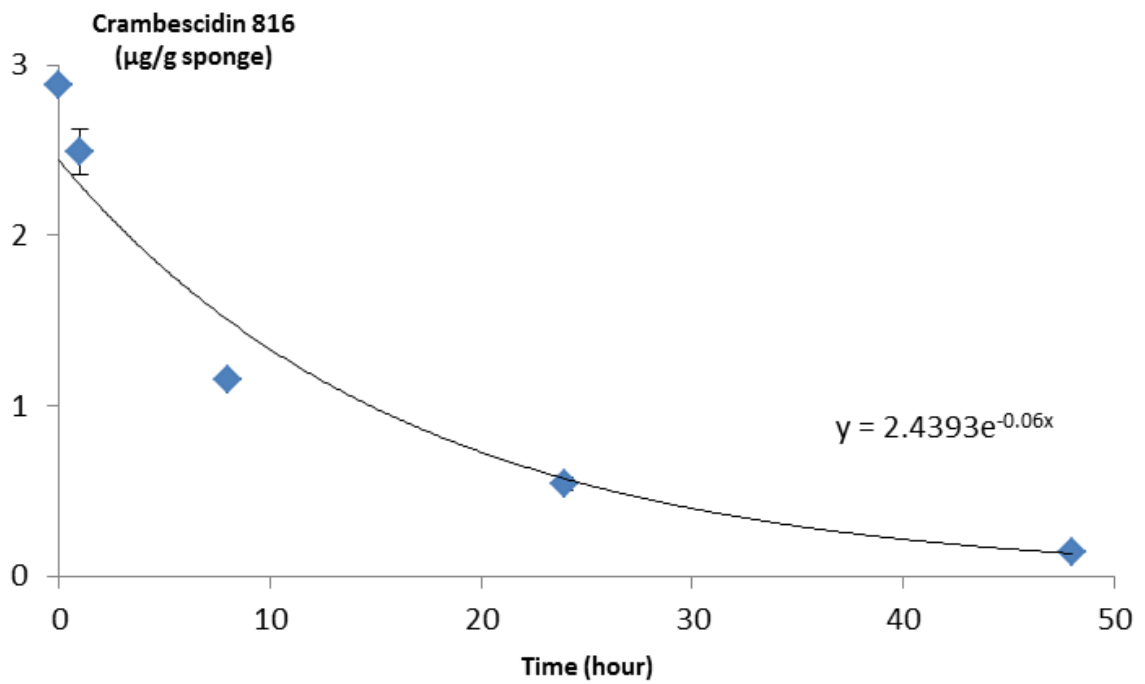

Figure 5. Concentration of crambescidin 816 against time in the particulate phase (0.45 µm) from seawater regularly homogenized and kept in the dark. Error bars represent the variation between triplicates.
